# Supplementary material for: Clinical value of the 20% logistic EuroSCORE cut-off for selecting TAVI candidates: a single-centre cohort study analysis
Source: PubMed Central journal article supplement — Open Heart. 2020 Feb 19;7(1):e001194. doi: 10.1136/openhrt-2019-001194 (PMC7046969; doi:10.1136/openhrt-2019-001194), 2020-02-19
Supplement: openhrt-2019-001194supp001.pdf [file openhrt-2019-001194supp001.pdf]

**Supplementary table 1: Factors comprising the logistic EuroSCORE assessment tool**

| Factor                                                                                | Weight                                          |
|---------------------------------------------------------------------------------------|-------------------------------------------------|
| Patient-related                                                                       |                                                 |
| Age >60 years                                                                         | 1 point per additional 5 years (or fraction of) |
| Female gender                                                                         | 1 point                                         |
| Extracardiac arteriopathy                                                             | 2 points                                        |
| Neurological dysfunction severely affecting day-to-day function                       | 2 points                                        |
| Prior cardiac surgery                                                                 | 3 points                                        |
| Serum creatinine >200 µmol/L                                                          | 2 points                                        |
| Active endocarditis                                                                   | 3 points                                        |
| Critical preoperative state*                                                          | 3 points                                        |
| Cardiac-related                                                                       |                                                 |
| Unstable angina                                                                       | 1 point                                         |
| Moderate (30–50%) / poor (<30%) LVEF                                                  | 1 / 3 points                                    |
| MI within 90 days                                                                     | 2 points                                        |
| Pulmonary hypertension (SPA >60 mmHg)                                                 | 2 points                                        |
| Operation-related factors                                                             |                                                 |
| Emergency setting                                                                     | 2 points                                        |
| Concomitant cardiac procedure <sup>†</sup>                                            | 2 points                                        |
| Surgery on thoracic aorta                                                             | 3 points                                        |
| Post-infarct septal rupture                                                           | 4 points                                        |
| German HIC classification:                                                            |                                                 |
| Log(total points) ≥20: high surgical mortality risk, eligible for TAVI reimbursement  |                                                 |
| Log(total points) <20: low surgical mortality risk, ineligible for TAVI reimbursement |                                                 |

Legend: LVEF, left ventricular ejection fraction; MI, myocardial infarction; SPA, systolic pulmonary artery pressure; HIC, health insurance company; TAVI, transcatheter aortic valve implantation. \*≥1 of the following: ventricular tachycardia/fibrillation, aborted sudden death, preoperative cardiac massage/ventilation/inotropic support/acute renal failure, and/or intraaortic balloon counterpulsation. <sup>†</sup> other than CABG.

**Supplementary table 2: Novel, TAVI-specific risk stratification tools**

| Risk assessment tool | Time scale of risk prediction | Factors considered in the scoring system                                                                                                                                                                                                                                                                                                                                                                                                                                                                                                                                              |
|----------------------|-------------------------------|---------------------------------------------------------------------------------------------------------------------------------------------------------------------------------------------------------------------------------------------------------------------------------------------------------------------------------------------------------------------------------------------------------------------------------------------------------------------------------------------------------------------------------------------------------------------------------------|
| SURTAVI [33]         | 30 days/1 year                | Significant concurrent CAD requiring revascularisation; frailty; reduced LVEF; neurological dysfunction; COPD; PAD; renal disease; redo cardiac surgery; pulmonary hypertension; diabetes                                                                                                                                                                                                                                                                                                                                                                                             |
| OBSERVENT [32]       | 30 days                       | eGFR <45 mL/min; critical state; pulmonary hypertension; diabetes mellitus; NYHA class IV; prior BAV; LVEF <40%                                                                                                                                                                                                                                                                                                                                                                                                                                                                       |
| STT score [31]       | 30 days/1 year                | Prior stroke; inverse of renal clearance; peak SPA pressure >50 mmHg                                                                                                                                                                                                                                                                                                                                                                                                                                                                                                                  |
| FRANCE-2 [29]        | 30 days                       | Age ≥ 90; BMI <29.9 or <18.5; NYHA class IV; ≥2 pulmonary odemas in previous year; SPA pressure ≥ 60 mmHg; critical state; respiratory insufficiency; dialysis; TA access approach; access approach other than TA, TF and subclavian                                                                                                                                                                                                                                                                                                                                                  |
| TARIS [28]           | 1 year                        | Age; female gender; BMI; pulmonary hypertension; eGFR; haemoglobin; SPA pressure; LVEF                                                                                                                                                                                                                                                                                                                                                                                                                                                                                                |
| TAVI2-SCORE [30]     | 1 year                        | Age >85 years; male gender; porcelain aorta; recent MI; CrCl <30 ml/kg/min; haemoglobin < 10 g/dL; low LVEF; AV mean gradient ≥70 mmHg                                                                                                                                                                                                                                                                                                                                                                                                                                                |
| German AV score [34] | In-hospital                   | Female gender; age (number of completed years); BMI <22 kg/m <sup>2</sup> or >39 kg/m <sup>2</sup> ; NYHA class IV; CCS class III or IV; cardiogenic shock <48 h; cardiopulmonary resuscitation within 48 h; absence of pulmonary hypertension; sinus rhythm; ASA class IV/V; LVEF < 30%; CAD (number of diseased vessels); infectious endocarditis/septic condition; diabetes mellitus; arterial vessel disease (other than coronary); preoperative haemodialysis or creatinine level >2.3 mg/dl; mechanical circulatory support (preoperative); redo surgery (heart/thoracic aorta) |

*Legend:* CAD, coronary artery disease; LVEF, left ventricular ejection fraction; COPD, chronic obstructive pulmonary disease; PAD, peripheral artery disease; eGFR, glomerular filtration rate; NYHA, New York Heart Association; BAV, balloon aortic valvuloplasty; SPA, systolic pulmonary artery; BMI, body mass index; TA, transapical; TF, transfemoral; CrCl, creatinine clearance; Av, aortic valve; CCS, Canadian Cardiovascular Society; ASA, American Society of Anesthesiologists
