# Supplementary figures and images for: Clinical value of the 20% logistic EuroSCORE cut-off for selecting TAVI candidates: a single-centre cohort study analysis
Source: PubMed Central journal article supplement — Open Heart. 2020 Feb 19;7(1):e001194. doi: 10.1136/openhrt-2019-001194 (PMC7046969; doi:10.1136/openhrt-2019-001194), 2020-02-19

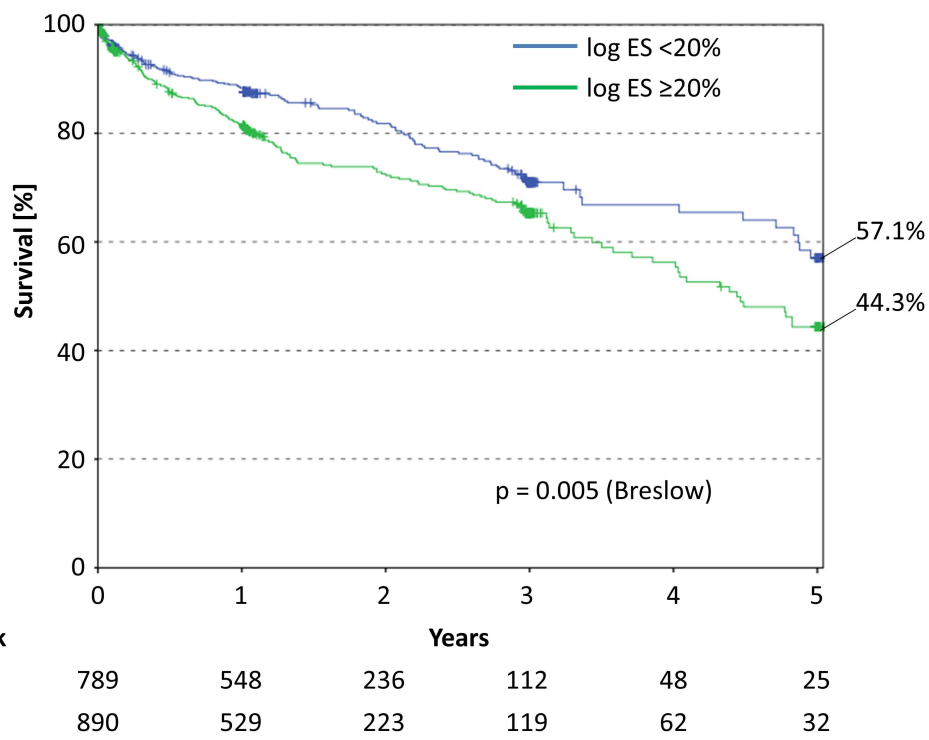

Supplement: openhrt-2019-001194supp002.pdf [file openhrt-2019-001194supp002.pdf]
